# Supplementary material for: Thermoresponsive Polyphosphoester via Polycondensation Reactions: Synthesis, Characterization, and Self-Assembly
Source: MDPI journal article supplement (doi:10.3390/molecules27186006), 2022-09-15
Supplement: s1 [file s1]

# Thermoresponsive Polyphosphoester via Polycondensation Reactions: Synthesis, Characterization, and Self-Assembly

Yoshihiro Yamakita<sup>1</sup>, Issei Tekauchi<sup>1</sup>, Kimiko Makino<sup>1</sup>, Hiroshi Terada<sup>1</sup>, Akihiko Kikuchi<sup>1</sup>,  
Kolio Troev<sup>1,2</sup>

## Supplementary Data:

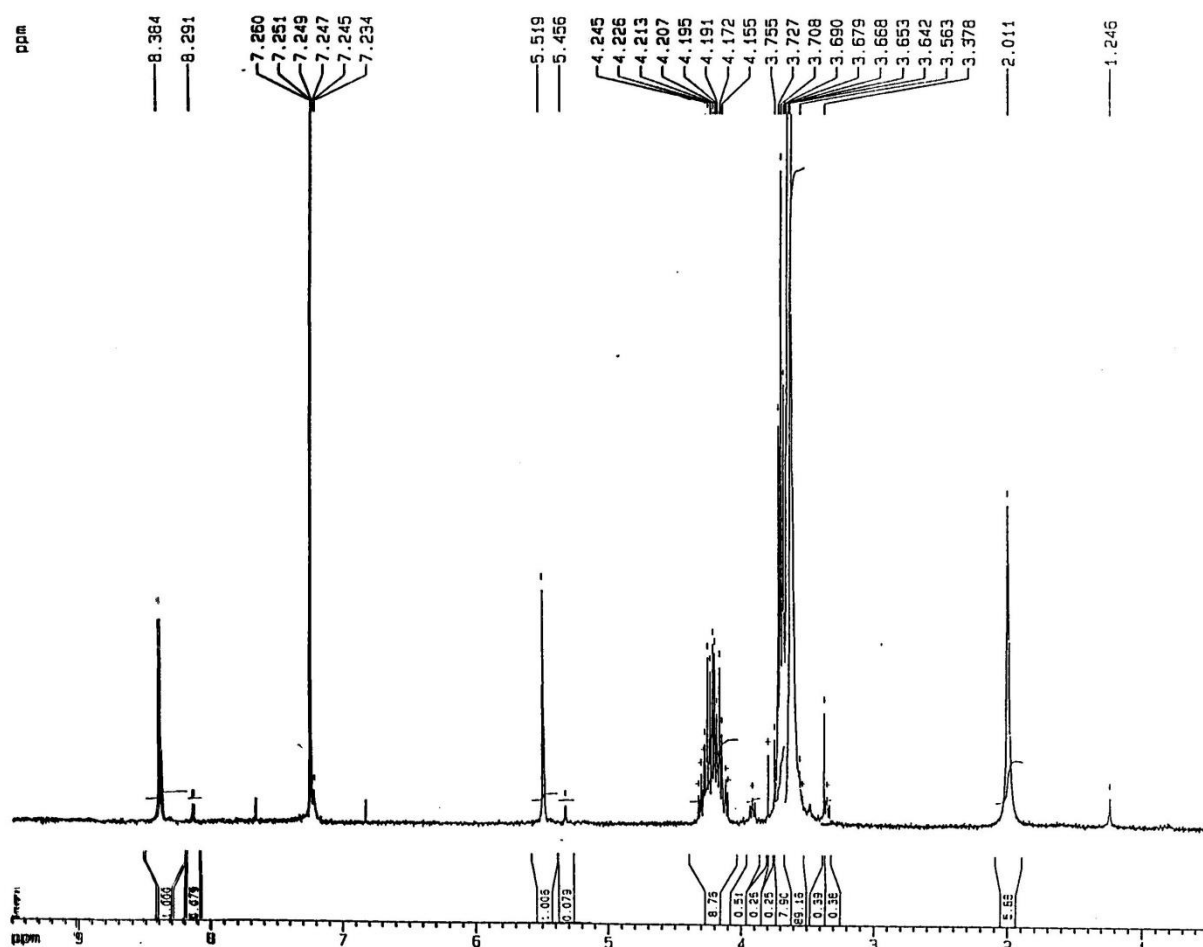

**Figure S1.** <sup>1</sup>H NMR spectrum of poly(oxyethylene H-phosphonate), based on PEG 400.

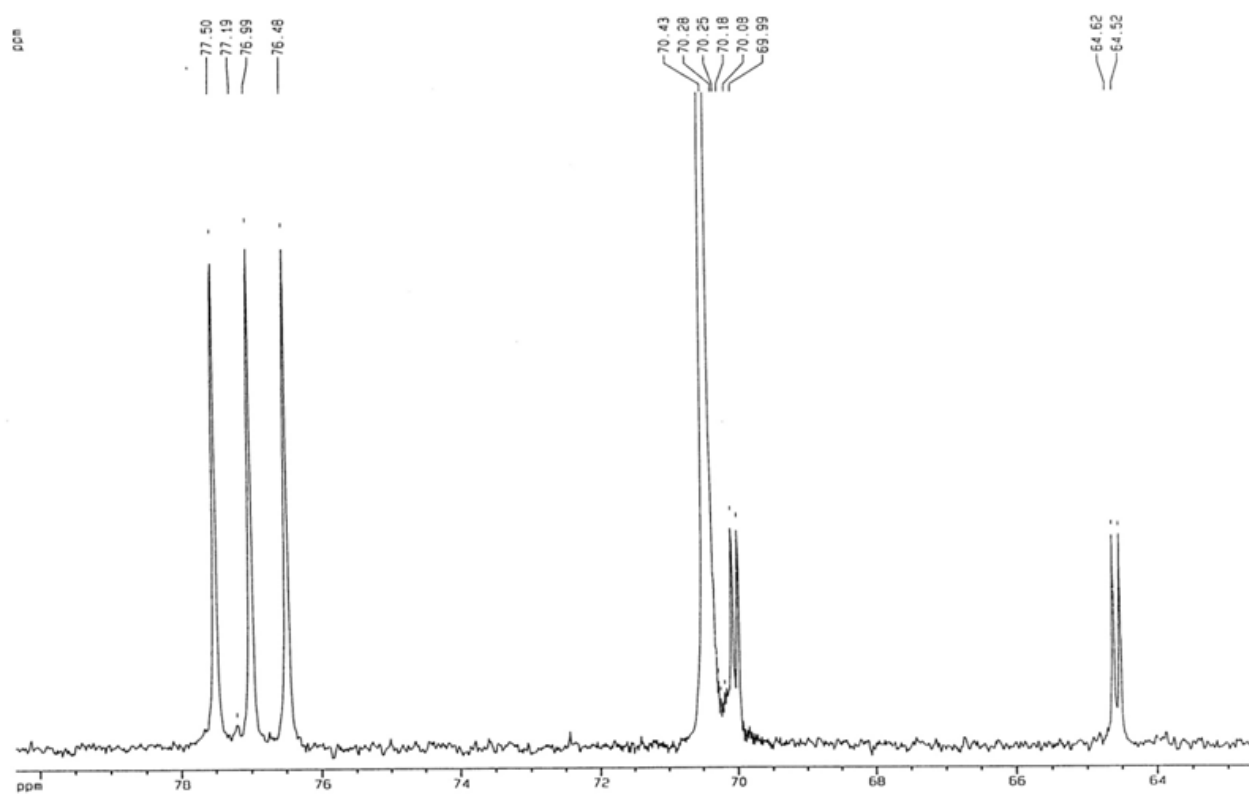

**Figure S2.**  $^{13}\text{C}\{\text{H}\}$  NMR spectrum of poly(oxyethylene H-phosphonate), based on PEG 400.

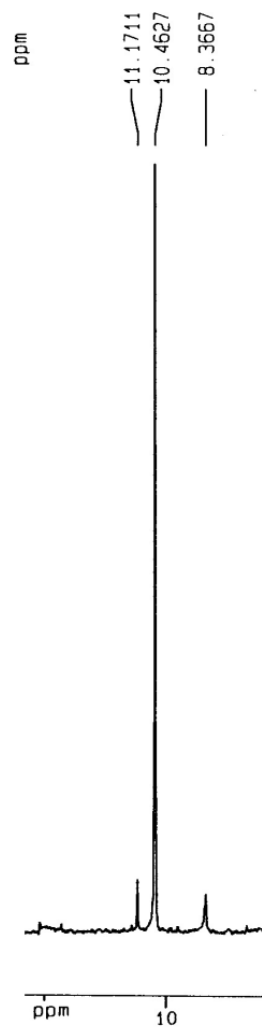

**Figure S3.**  $^{31}\text{P}\{^1\text{H}\}$  NMR spectra of poly(oxyethylene H-phosphonate), based on PEG 400.

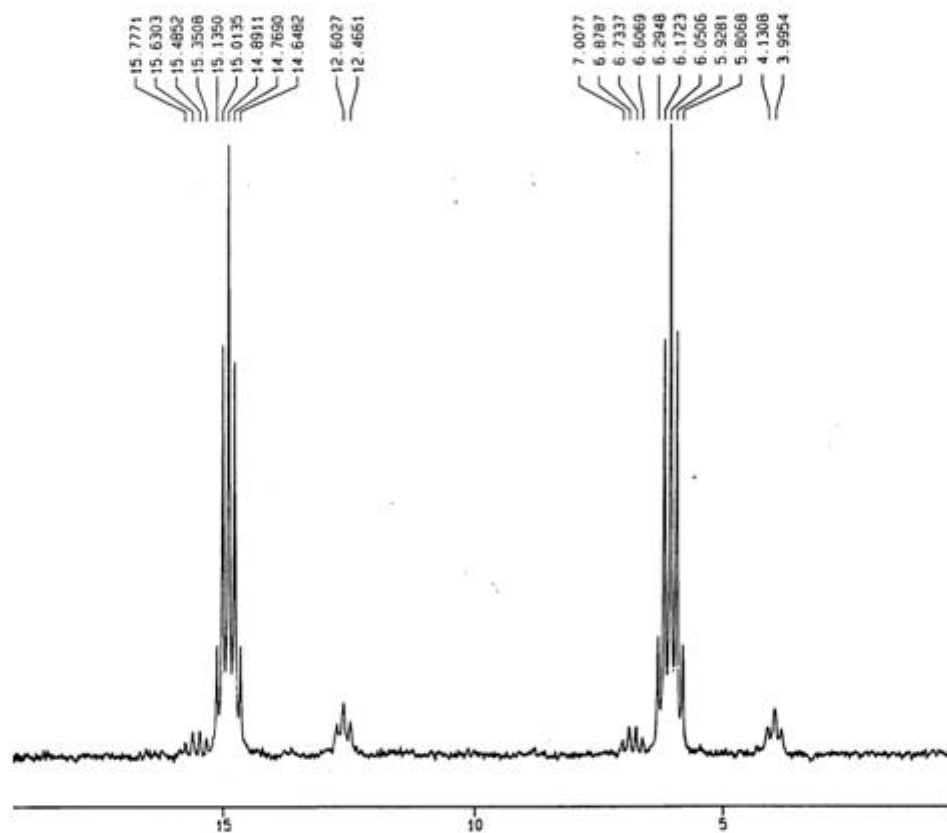

**Figure S4.**  $^{31}\text{P}$  NMR spectra of poly(oxyethylene H-phosphonate), based on PEG 400.

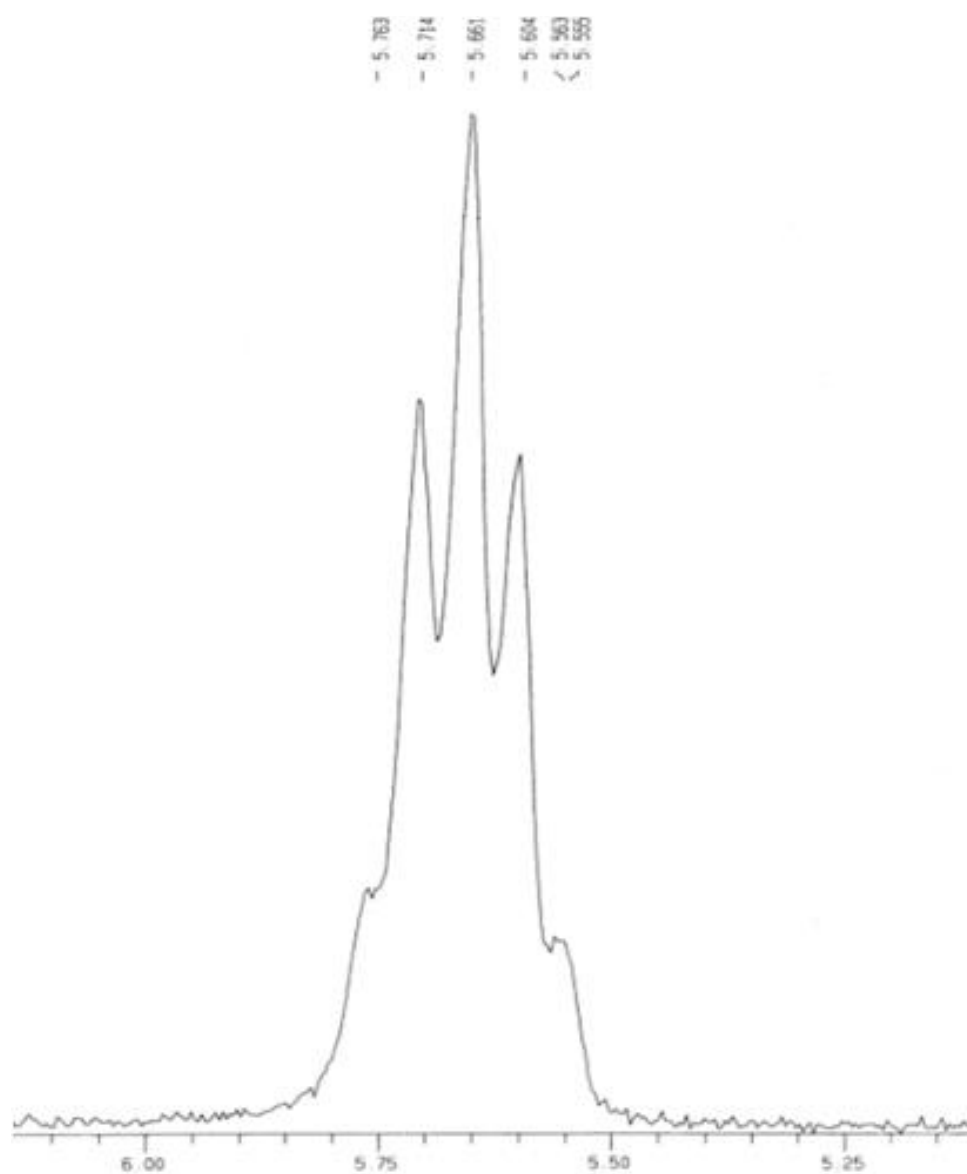

**Figure S5.**  $^{31}\text{P}$  NMR spectra of poly(chloroxyethylene phosphate), based on PEG 400. Signal for phosphorous atom in the repeating units.

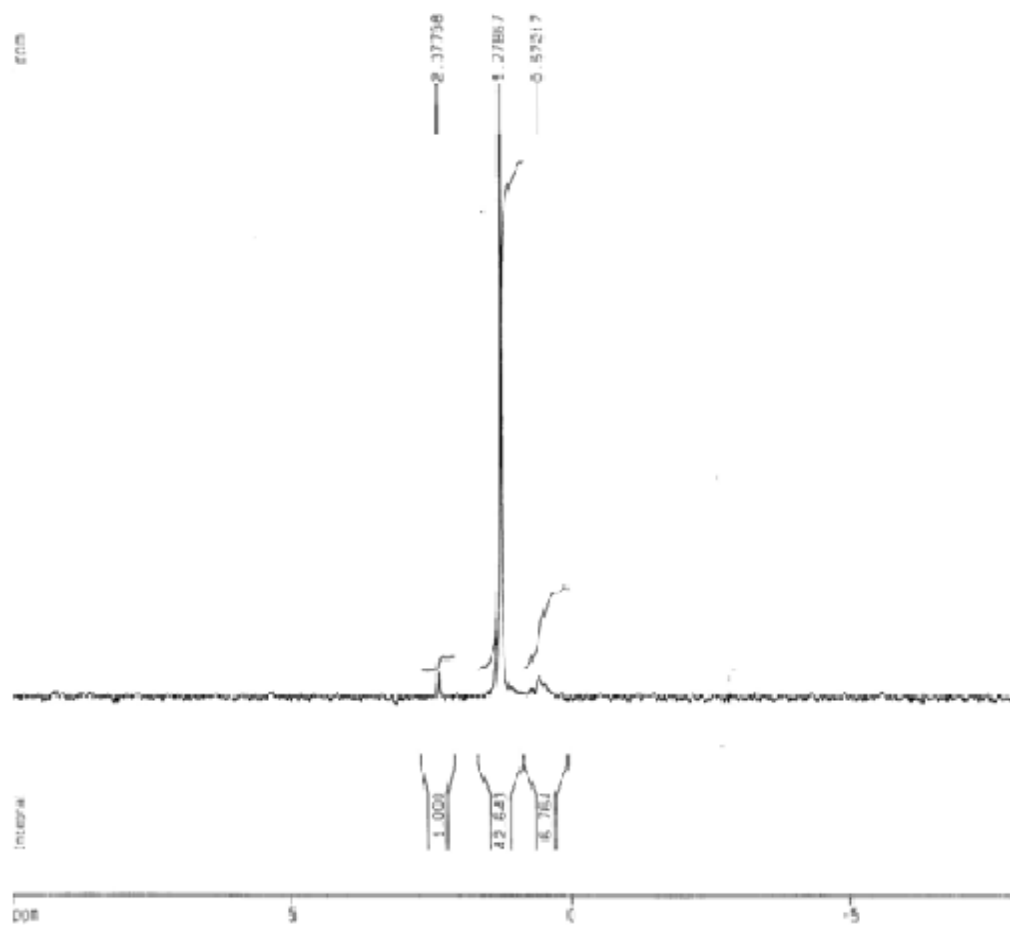

**Figure S6.**  $^{31}\text{P}\{\text{H}\}$  NMR spectra of poly(methoxyethylene phosphate, based on PEG 400.

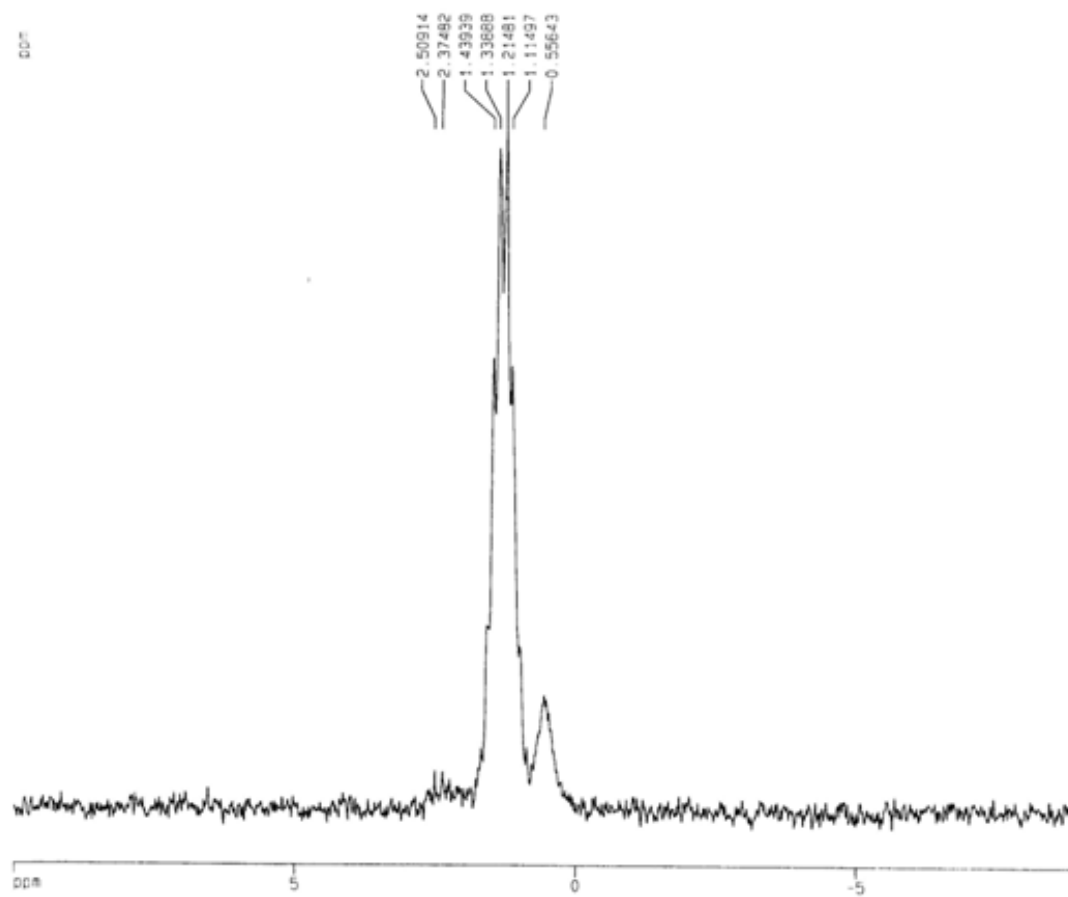

**Figure S7.**  $^{31}\text{P}$  NMR spectrum of poly(methoxyethylene phosphate), based on PEG 400.
